# Supplementary material for: Solid ionic liquids with macro–microporous structure for efficient heterogeneous catalysis of biodiesel
Source: Royal Society of Chemistry journal article supplement (doi:10.1039/d3nj00773a), 2023-01-01
Supplement: d3nj00773a1.pdf [file d3nj00773a1.pdf]

## Supplementary Information

### **Solid ionic liquids liquid with macro-microporous structure for efficient heterogeneous macromolecular catalysis**

Jiao Rong Li, <sup>#a</sup> Yu Chen Han, <sup>#a</sup> Wen Long Xue, <sup>a, d</sup> Zhong Feng Li, <sup>\*a</sup> Yu Heng Deng, <sup>\*a</sup> and

Chong-Qing Wan<sup>\*a, b, c</sup>

<sup>a</sup> *Department of Chemistry, Capital Normal University, Beijing 100048, P. R. China.*

<sup>b</sup> *Key Laboratory of Bioorganic Phosphorus Chemistry & Chemical Biology (Ministry of Education), Department of Chemistry, Tsinghua University, Beijing 100084, P. R. China.*

<sup>c</sup> *State Key Laboratory of Structural Chemistry, Fujian Institute of Research on the Structure of Matter Chinese Academy of Sciences, Fuzhou, Fujian 350002, P. R. China.*

<sup>d</sup> *Anorganische Chemie, Fakultät für Chemie & Chemische Biologie, Technische Universität Dortmund, Otto-Hahn Straße 6, 44227 Dortmund, Germany*

<sup>#</sup> *These authors contributed equally to this work*

## Experimental

**Reagents:** All chemicals were obtained from commercial sources and used without further purification. 4-Carboxyphenylboronic acid ( $C_7H_7BO_4$ , Energy Chemical Company, 98%), 4-bromo-3-methylbenzoic acid ( $C_8H_7BrO_2$ , Energy Chemical Company, 98%) Zirconium tetrachloride ( $Cl_4Zr$ , Energy Chemical Company, 99%), Imidazole ( $C_3H_4N_2$ , TCI Shanghai, 98%), 1,3-propanesultone ( $C_3H_6O_3S$ , J&K Scientific Ltd., 99%), Methanesulfonic acid ( $CH_3SO_3H$ , Energy Chemical Company, 99%) and ethanol ( $C_2H_5OH$ , Sinopharm Chemical Reagent Beijing Co. Ltd., >99.8%) all were used as received.

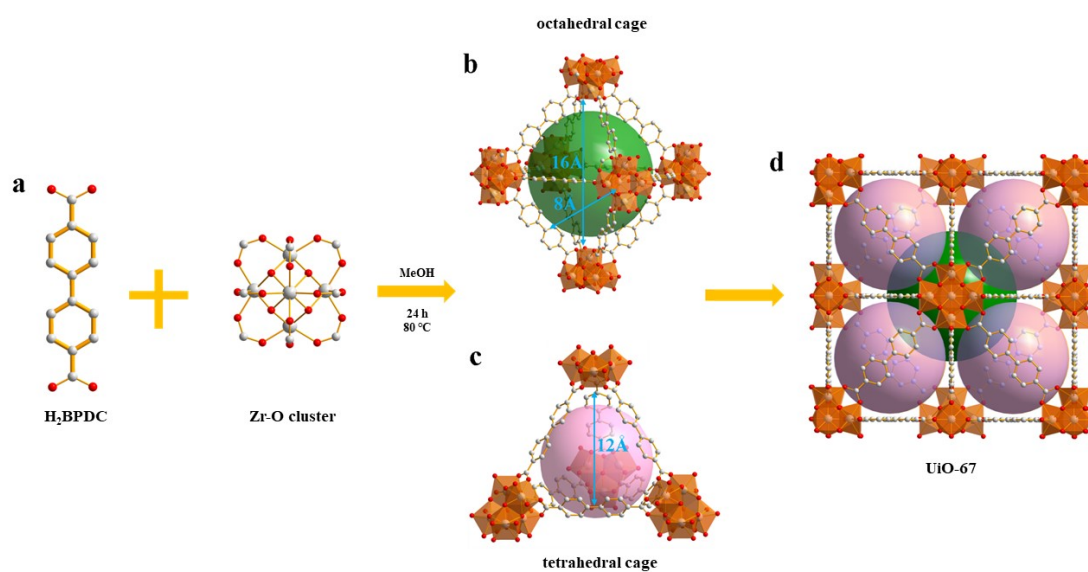

**Figure S1.** Schematic synthesis of micro structure of UiO-67. (a) H<sub>2</sub>BPDC ligand. (b) octahedral cage, (c) tetrahedral cage and (d) UiO-67. Red ball is oxygen, grey ball is carbon.

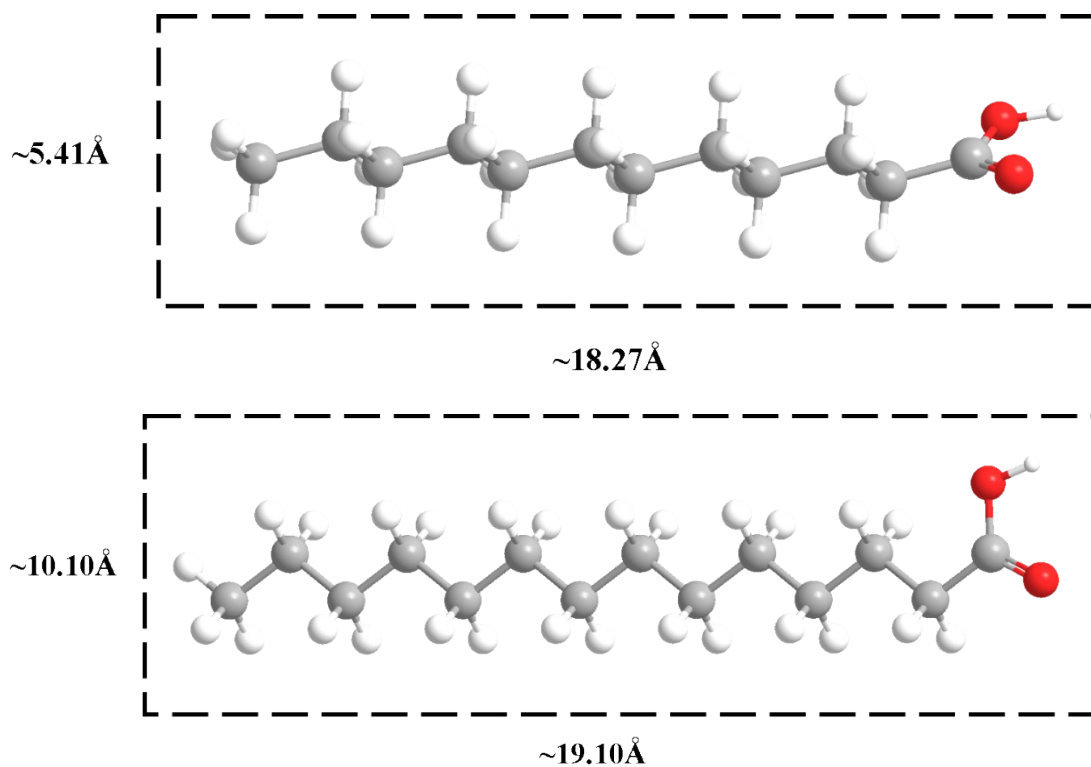

**Figure S2.** Molecular size data of dodecanoic acid (top) and myristic acid (bottom).

**Table S1.** BET, pore volume, pore size of UiO-67-MIMS, Macro-UiO-67-MIMS and Macro-UiO-67-ILs

| Material          | N <sub>2</sub> adsorption data |                                  |               |
|-------------------|--------------------------------|----------------------------------|---------------|
|                   | BET (m <sup>2</sup> /g)        | Pore volume (cm <sup>3</sup> /g) | Pore size (Å) |
| UiO-67-MIMS       | 320.22                         | 0.423                            | ~6/~12        |
| Macro-UiO-67-MIMS | 364.3191                       | 0.4449                           | ~12           |
| Macro-UiO-67-ILs  | 101.3936                       | 0.3351                           | ~12           |

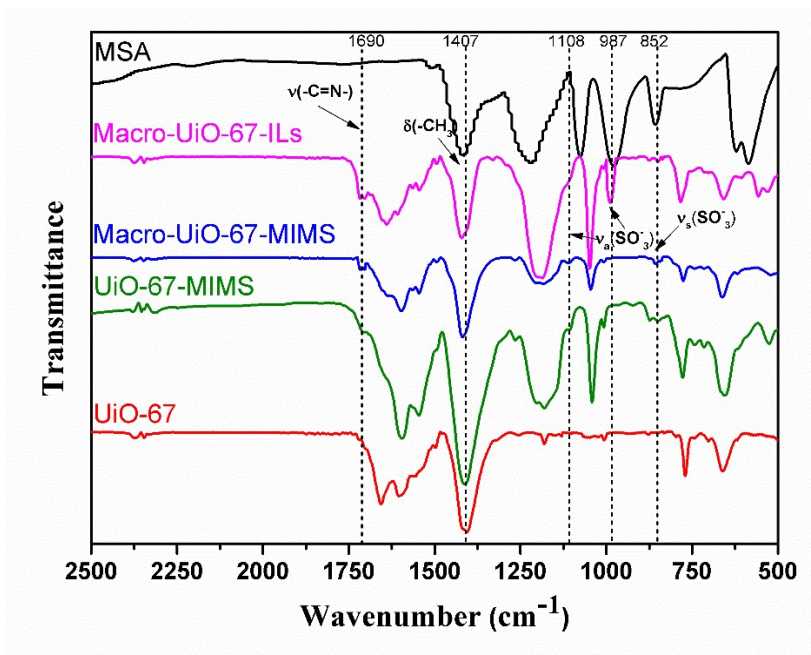

**Figure S3.** FT-IR of UiO-67, UiO-67-MIMS, Macro-UiO-67-MIMS, Macro-UiO-67-ILs and MSA.

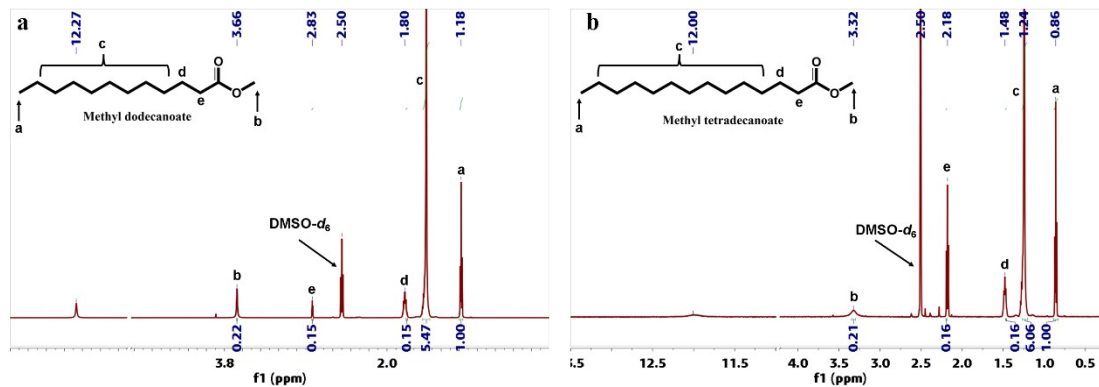

**Figure S4.** The catalytic process of (a) methyl dodecanoate and (b) methyl tetradecanoate without catalyst digested by  $\text{DMSO}-d_6$ .

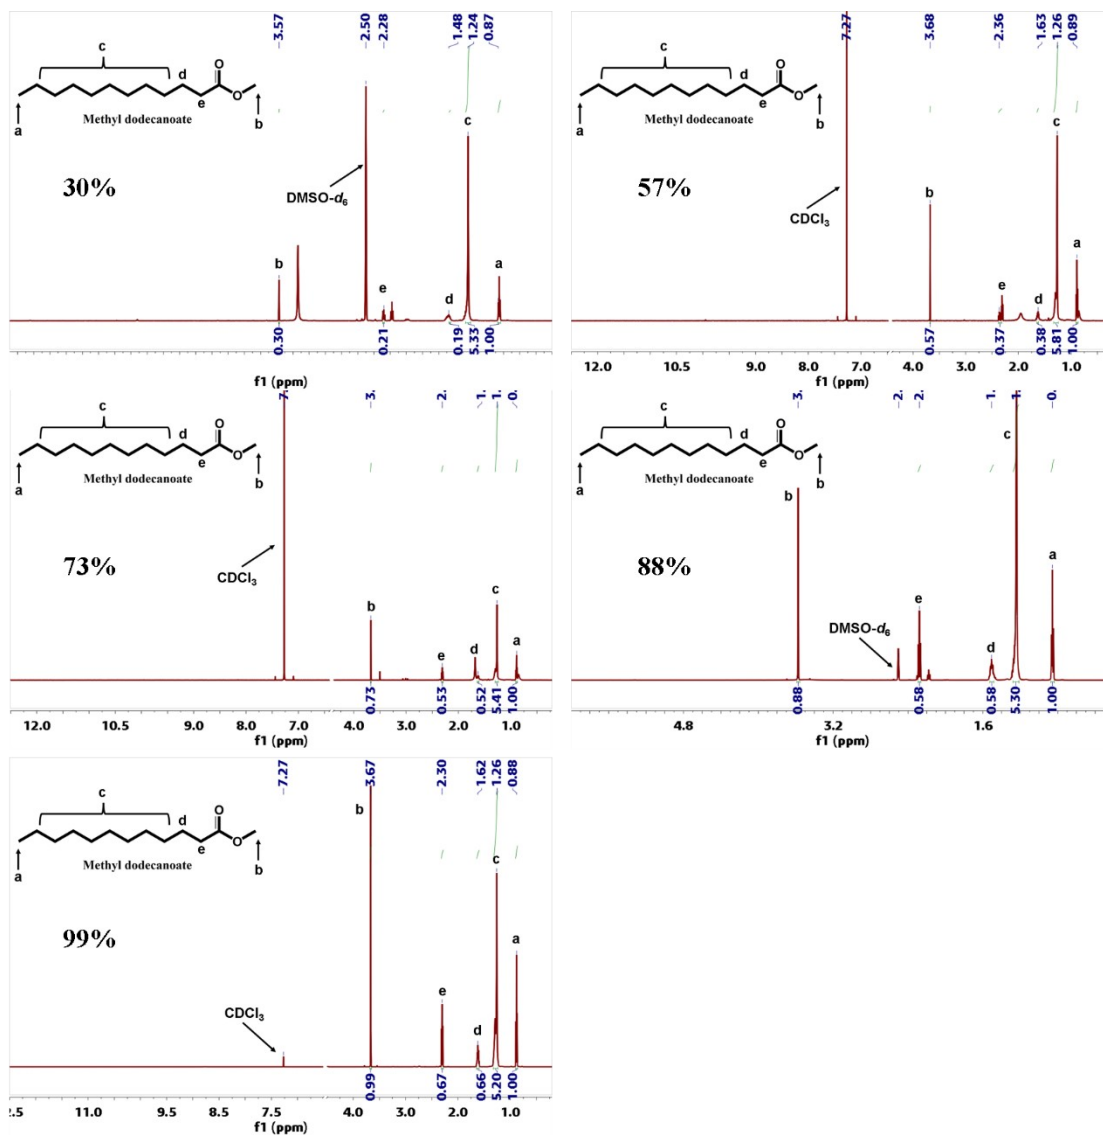

**Figure S5.** The catalytic process of methyl dodecanoate of **Macro-UiO-67-ILs** digested by DMSO-*d*<sub>6</sub> and CDCl<sub>3</sub>.

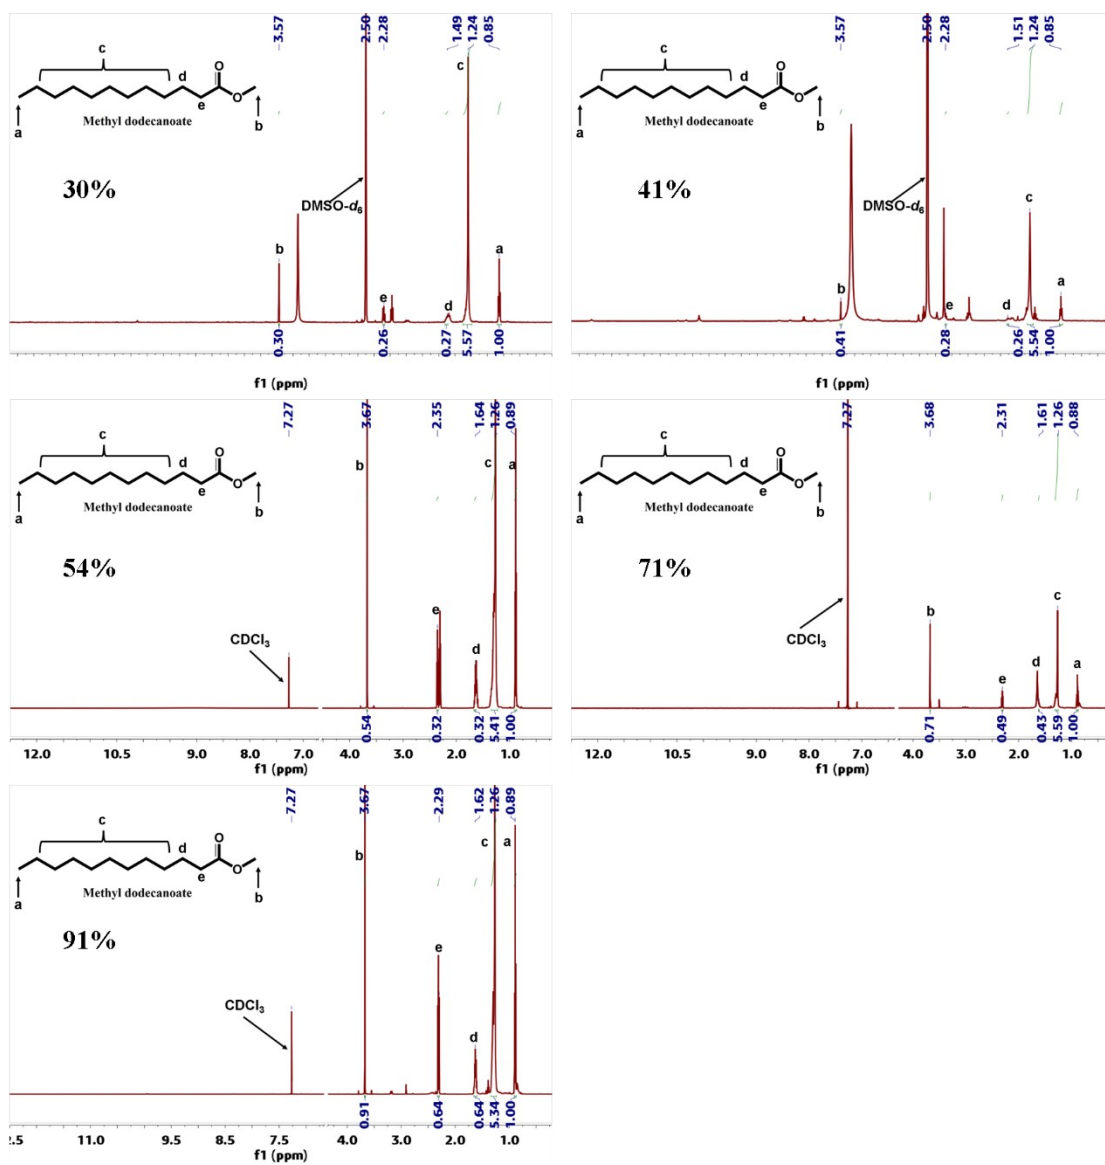

**Figure S6.** The catalytic process of methyl dodecanoate of MSA digested by DMSO-d<sub>6</sub> and CDCl<sub>3</sub>.

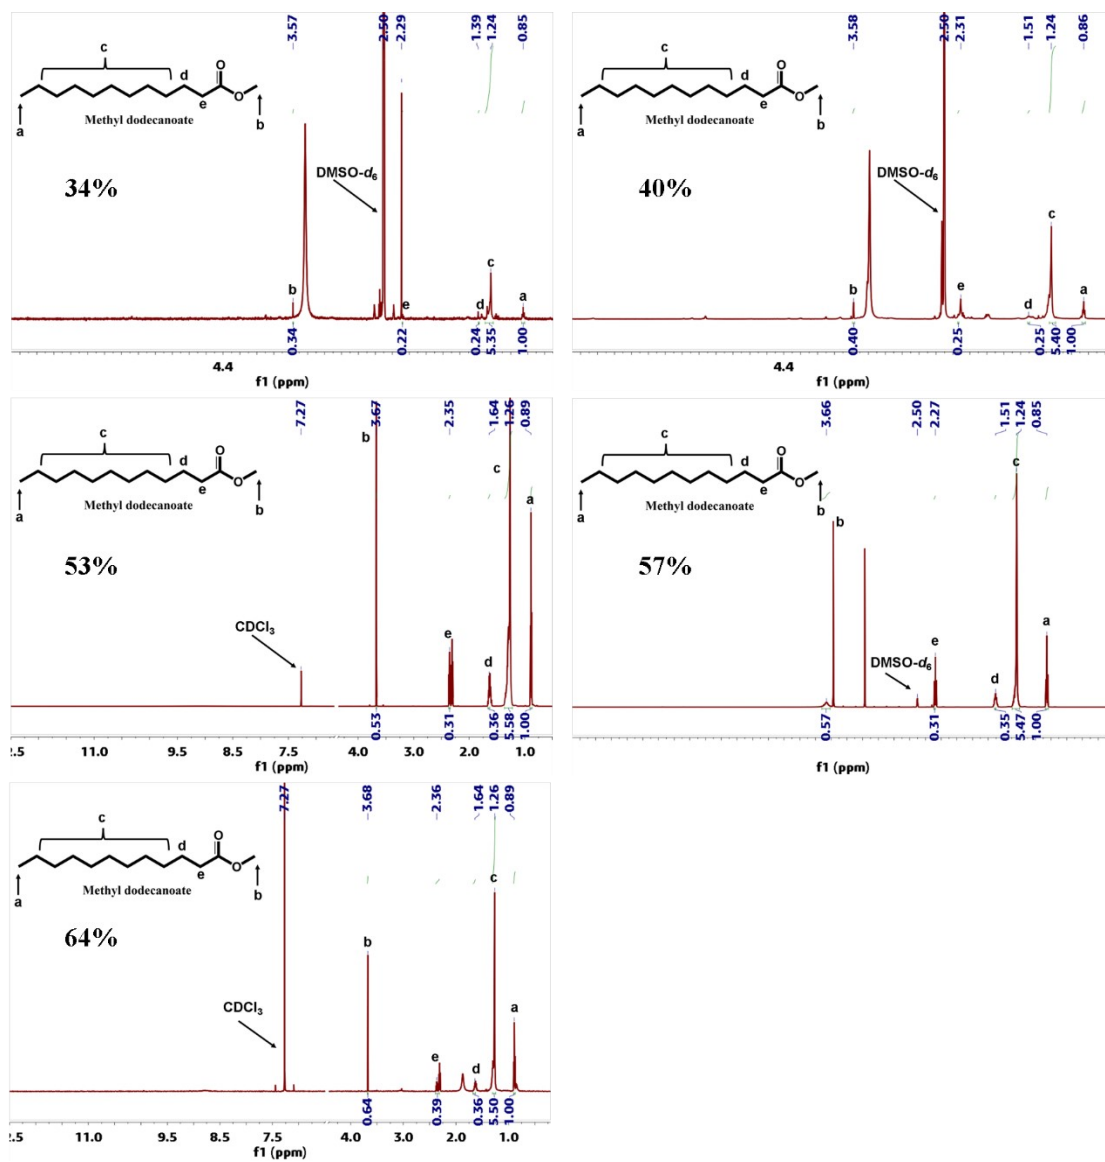

**Figure S7.** The catalytic process of methyl dodecanoate of **UiO-67-ILs** digested by  $\text{DMSO-d}_6$  and  $\text{CDCl}_3$ .

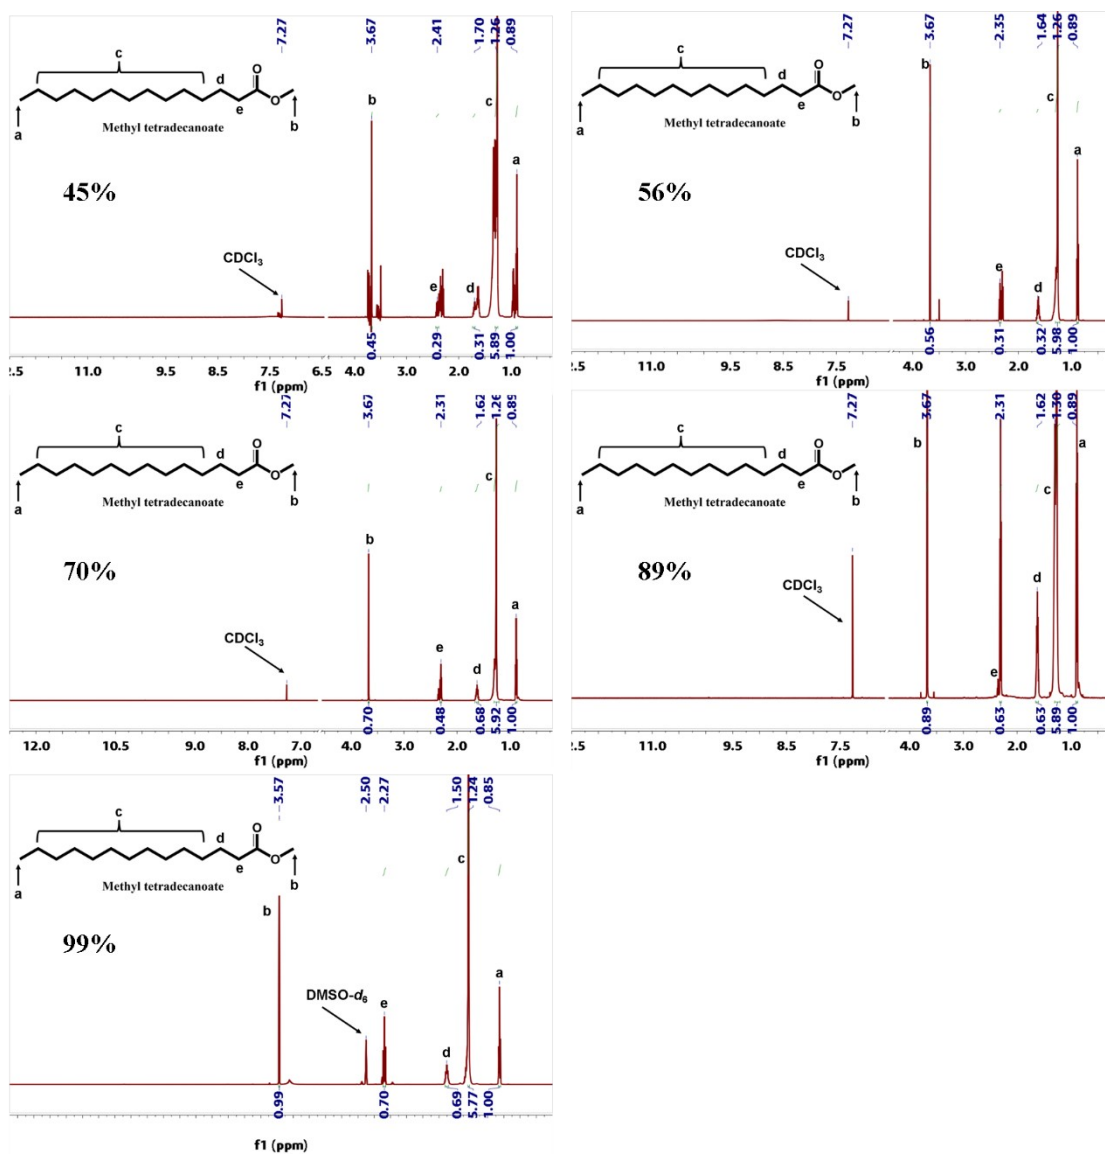

**Figure S8.** The catalytic process of methyl tetradecanoate of macro-UiO-67-ILs digested by DMSO-d<sub>6</sub> and CDCl<sub>3</sub>.



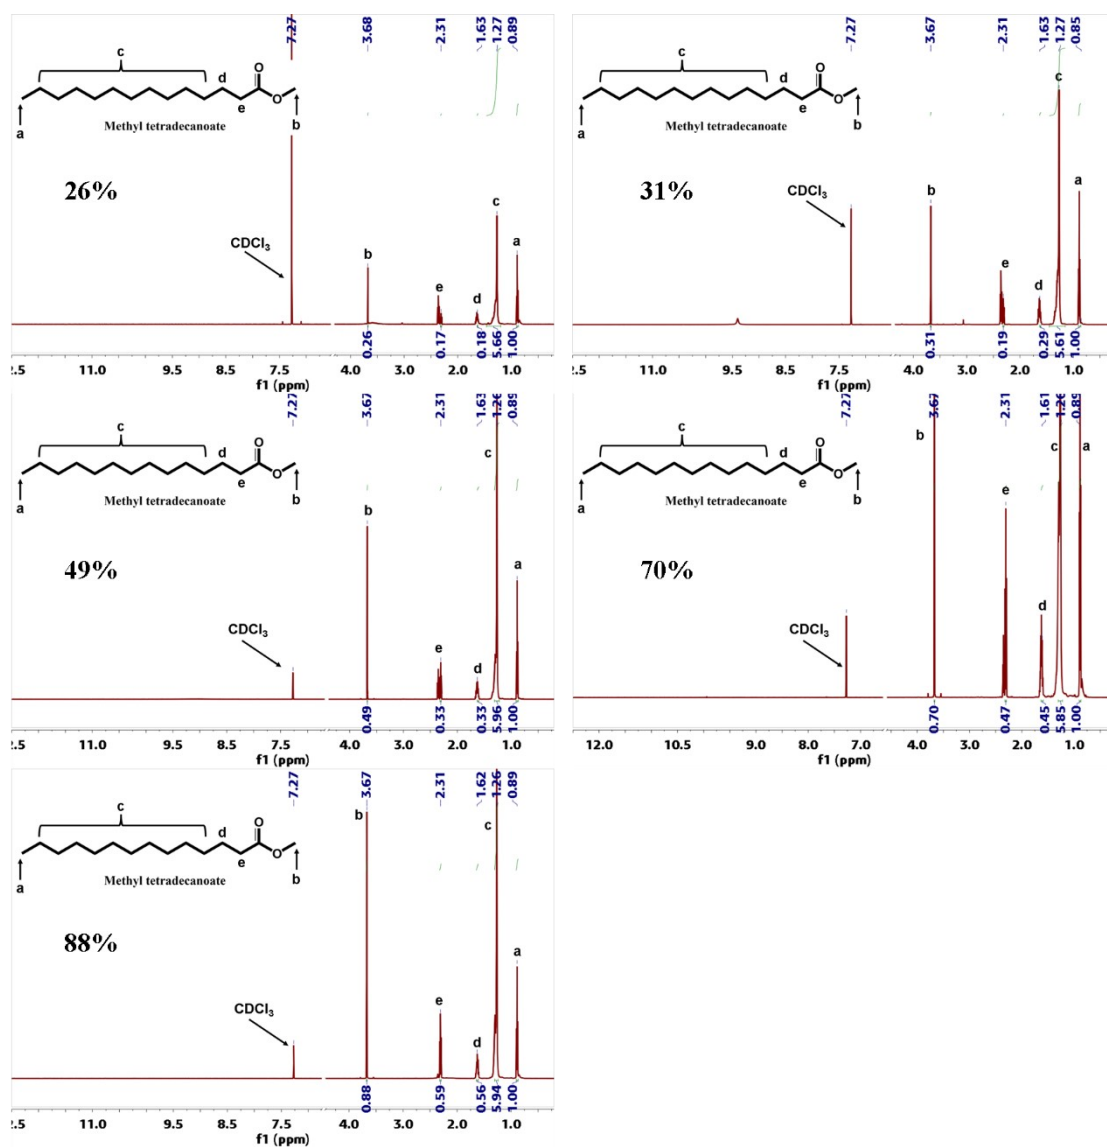

**Figure S9.** The catalytic process of methyl tetradecanoate of MSA digested by DMSO-d<sub>6</sub> and CDCl<sub>3</sub>.

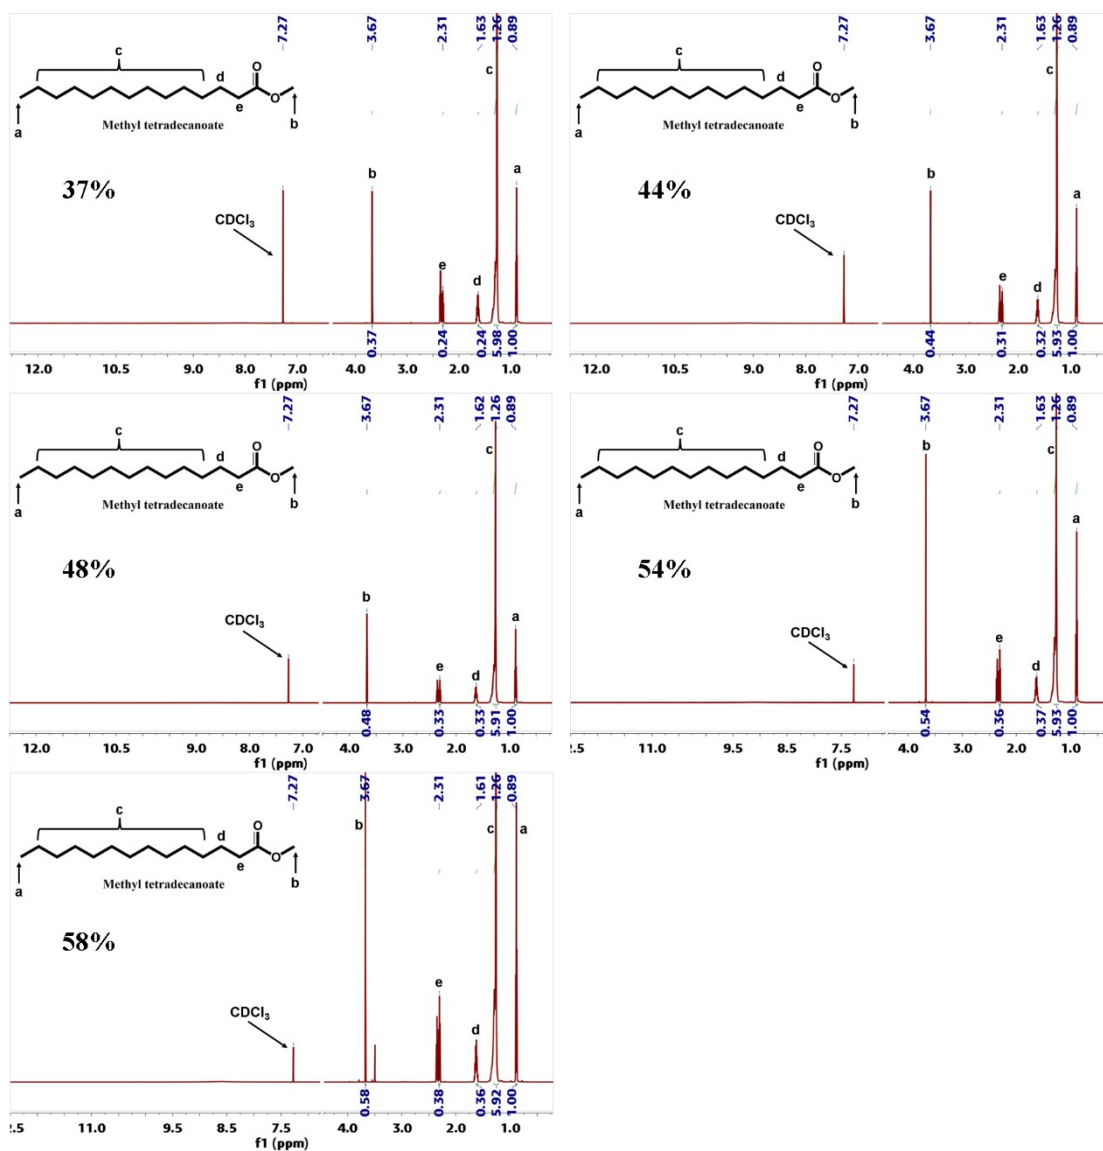

**Figure S10.** The catalytic process of methyl tetradecanoate of UiO-67-ILs digested by  $\text{DMSO-d}_6$  and  $\text{CDCl}_3$ .

In the course of the reaction, take 200  $\mu\text{l}$  of the mixed liquid every 5 minutes last 30 minutes, dry it in a vacuum oven, and dissolve it in the deuterated reagent. The ratio of the methyl peak at b to the area of the methyl peak at a is used to determine the degree of reaction.
